# Supplementary material
Source: PubMed Central journal article supplement (PMC8200877)
Supplement: 12250_2015_3621_MOESM1_ESM.pdf [file 12250_2015_3621_MOESM1_ESM.pdf]

## Electronic Supplementary Material

# Investigation of the genotype III to genotype I shift in Japanese encephalitis virus and the impact on human cases

Na Han<sup>3,4</sup>, James Adams<sup>2</sup>, Wei Fang<sup>2</sup>, Si-Qing Liu<sup>2</sup>, Simon Rayner<sup>1,2</sup>✉

1. Department of Medical Genetics, Oslo University Hospital, Oslo 0271, Norway
2. State Key Laboratory of Virology, Wuhan Institute of Virology, Chinese Academy of Sciences, Wuhan 430071, China
3. State Key Laboratory for Infectious Diseases Prevention and Control, National Institute for Communicable Disease Control and Prevention, Chinese Center for Disease Control and Prevention, Beijing 102206, China
4. Collaborative Innovation Center for Diagnosis and Treatment of Infectious Diseases, Hangzhou 310003, China

Supporting information to DOI 10.1007/s12250-015-3621-4

Table S1. List of Chinese papers.

| Year      | City, province | Genotype | Strain      | Serum conversion rate/Vaccine coverage | Reference                          | PubMed ID | English title                                                                                                                    | Journal name                |
|-----------|----------------|----------|-------------|----------------------------------------|------------------------------------|-----------|----------------------------------------------------------------------------------------------------------------------------------|-----------------------------|
| 1990-2007 | Inner Mongolia | -        | -           | -                                      | 1950-2007年内蒙古自治区流行性乙型脑炎流行病学特征分析    | none      | Epidemiology of Japanese encephalitis in inner Mongolia, 1950-2007                                                               | Diseases Surveillance       |
| 1976-2007 | Yunnan         | -        | -           | -                                      | 1976-2007年云南省流行性乙型脑炎流行病学特征分析       | none      | Analysis of Epidemiological Characteristics of Japanese Encephalitis in Yunnan Province from 1976 to 2007                        | Endemic Diseases Bulletin   |
| 1990-2003 | Guangxi        | -        | -           | 6.22%                                  | 1990-2003年广西流行性乙型脑炎流行病学分析          | none      | Epidemiological features of epidemic Japanese encephalitis in Guangxi Province from 1990 to 2003                                 | Guangxi Prev Med            |
| 1997-2004 | Guizhou        | -        | -           | -                                      | 1997-2004年贵州省流行性乙型脑炎病例流行病学分析及控制策略  | none      | Preventive Control Strategy and Epidemiological Analysis on Japanese Encephalitis in Guizhou Province During 1997-2004           | Chin J Vector Bio & Control |
| 2000-2009 | Hefei, Anhui   | -        | -           | -                                      | 2000-2009年合肥市流行性乙型脑炎流行病学分析         | none      | Epidemiology of Japanese encephalitis in Hefei, 2000-2009                                                                        | Disease Surveillance        |
| 2004-2005 | Guangxi        | -        | -           | 8.19%                                  | 2004-2005年广西流行性乙型脑炎流行病学分析          | none      | Epidemiological analysis of epidemic Japanese encephalitis in Guangxi Province from 2004 to 2005                                 | Applied Prev Med            |
| 2005-2009 | Luoyang, Henan | -        | -           | 13.90%                                 | 2005-2009年洛阳市流行性乙型脑炎流行病学特征分析       | none      | Analysis of the epidemic characteristics of Japanese encephalitis in Luoyang from 2005 to 2009                                   | J Med Pest Control          |
| 2007-2010 | HeBei          | -        | -           | 20.63%                                 | 2007-2010年河北省流行性乙型脑炎流行病学特征分析       | none      | Analysis on the epidemic characteristics of Japanese encephalitis in Hebei Province from 2007 to 2010                            | J Med Pest Control          |
| 2009      | Jiangxi        | I型       | JX0903      | -                                      | 2009年江西省新分离流行性乙型脑炎病毒株全基因组分子生物学特性研究 | none      | Molecular characteristics of full-length genome of Japanese encephalitis virus strain(JX0939) newly isolated in Jiangxi province | Diseases Surveillance       |
| 2010      | Fujian         | I型       | FJ-JY-10-73 | -                                      | 2010年福建省流行性乙型脑炎病毒监测                | none      | Genotype I Japanese encephalitis virus is the main genotype in mosquito in Fujian province                                       | Chinese J Exp Clin Virol    |
| 2005-2009 | Fujian         | -        | -           | 25.95%                                 | 福建省2005-2009年流行性乙型脑炎流行病学分析         | none      | The epidemiological analysis of epidemic Japanese encephalitis in 2005-2009 years in Fujian Province                             | Chin J Dis Control Prev     |

|           |                      |    |   |        |                                |      |                                                                                                                                               |                                                     |
|-----------|----------------------|----|---|--------|--------------------------------|------|-----------------------------------------------------------------------------------------------------------------------------------------------|-----------------------------------------------------|
| 1990-2000 | Guangdong            | -  | - | -      | 广东省1990-2000年流行性乙型脑炎流行情况分析     | none | Epidemiological analysis of epidemic Japanese encephalitis between 2005 and 2009 years in Guangdong Province                                  | Guangdong Journal of Health and Epidemic Prevention |
| 1990-2006 | Guangxi              | -  | - | < 40%  | 广西1992-2006年流行性乙型脑炎流行特征分析      | none | Analysis of prevalent features of epidemic encephalitis B in Guangxi from 1992 to 2006                                                        | CHINA TROPICAL MEDICINE                             |
| 2004-2008 | Guangxi              | -  | - | -      | 广西2004-2008年流行性乙型脑炎流行特征分析      | none | Analysis on the epidemic characteristics of Japanese B encephalitis in Guangxi Zhuang Autonomous Region in 2004~2008                          | CHINA TROPICAL MEDICINE                             |
| 2006      | Beiliu, Guangxi      | I型 | - | -      | 广西北流市分离到基因I型流行性乙型脑炎病毒          | none | Isolation of genotype I Japanese encephalitis virus in Beiliu, Guangxi                                                                        | Diseases Surveillance                               |
| 1990-2003 | Guangxi              | -  | - | 2.04%  | 广西壮族自治区1990-2003年流行性乙型脑炎流行情况分析 | none | Analysis of the epidemiological characteristics of epidemic encephalitis B between 1990 to 2003 in Guangxi Province, Zhuang autonomous region | Chinese Primary Health Care                         |
| 2002-2010 | Guangzhou, Guangdong | -  | - | 79.55% | 广州市2002-2010年流行性乙型脑炎流行病学分析     | none | Epidemiological analysis of Japanese B encephalitis in Guangzhou from 2002 to 2010                                                            | J Med Pest Control                                  |
| 1952-2007 | Guizhou              | -  | - | 34.80% | 贵州省1952-2007年流行性乙型脑炎流行情况分析     | none | EPIDEMIOLOGICAL ANALYSIS OF THE JAPANESE ENCEPHALITIS DURING 1952 TO 2007 IN GUIZHOU                                                          | Modern Preventive Medicine                          |
| 2004-2008 | Guizhou              | -  | - | 79.83% | 贵州省2004-2008年流行性乙型脑炎流行特征分析     | none | THE EPIDEMIC CHARACTERISTIC ANALYSIS ON THE JAPANESE B ENCEPHALITIS IN GUIZHOU PROVINCE DURING THE YEARS OF 2004-2008                         | Modern Preventive Medicine                          |
| 2000-2004 | Hebei                | -  | - | -      | 河北省2000-2004年流行性乙型脑炎流行病学特征分析   | none | Analysis on Japanese B Encephalitis in Hebei Province During 2000—2004                                                                        | Chinese Journal of Vaccines and Immunization        |
| 1971-2003 | Henan                | -  | - | -      | 河南省流行性乙型脑炎疫情及防制现状与对策           | none | Outbreak of epidemic encephalitis b in Henan province and implementation of prevention and countermeasures                                    | Henan J Prev Med                                    |

|           |                |         |        |          |                              |          |                                                                                                                                |                                              |
|-----------|----------------|---------|--------|----------|------------------------------|----------|--------------------------------------------------------------------------------------------------------------------------------|----------------------------------------------|
| 1951-2006 | Hubei          | -       | 41.20% | -        | 湖北省1951-2006年流行性乙型脑炎流行特征分析   | none     | Epidemiological features of epidemic Japanese encephalitis in Hubei in 1951~2006.                                              | CHINA TROPICAL MEDICINE                      |
| 1951-2000 | Hunan          | -       | -      | -        | 湖南省50年来流行性乙型脑炎流行病学分析         | none     | Epidemiological analysis of epidemic encephalitis B in Hunan province during the past 50 years                                 | Chin J Dis Control Prev                      |
| 1995-2006 | Jiangxi        | -       | -      | -        | 江西省1995-2006年流行性乙型脑炎流行病学分析   | none     | Epidemiological analysis of Japanese encephalitis b from 1995 to 2006 in Jiangxi province                                      | 江西医药                                         |
| 2002-2005 | Shanghai       | I型和III型 | -      | -        | 两种基因型流行性乙型脑炎病毒在上海市共同流行       | none     | Co-prevalence of two genotypes of Japanese encephalitis virus in Shanghai, China                                               | Chin J Vector Biol & Control                 |
| 1991-2010 | Inner Mongolia | -       | 99.29% | -        | 内蒙古自治区1991-2010年流行性乙型脑炎      | none     | Analysis on the epidemiological characteristics of Japanese encephalitis from 1991 to 2010 in Inner Mongolia Autonomous Region | Chin J Vector Biol & Control                 |
| 2008      | Shandong       | I型      | -      | SD08-10  | 山东省首次分离出基因I型流行性乙型脑炎病毒        | 20077734 | Isolation and Identification of Japanese Encephalitis Virus Firstly in Shandong Province                                       | CHINESE JOURNAL OF VACCINES AND IMMUNIZATION |
| 1960-2004 | Shanxi         | -       | -      | -        | 陕西省1960-2004年流行性乙型脑炎流行病学特征分析 | none     | analysis of the Epidemic Characteristics of Japanese B Encephalitis in Shanxi Province During 1960-2004                        | Chinese Journal of Vaccines and Immunization |
| 2004      | Sichuan        | -       | -      | -        | 四川省2004年流行性乙型脑炎流行特征分析        | none     | Analysis on the epidemiological characteristics of encephalitis B in Sichuan in 2004                                           | Modern Preventive Medicine                   |
| 2002      | Sichuan        | -       | 61.17% | -        | 四川省2002年流行性乙型脑炎监测            | none     | The Surveillance of Japanese Encephalitis in Sichuan Province in 2002                                                          | Chinese Journal of Vaccines and Immunization |
| 1952-2003 | Sichuan        | -       | -      | -        | 四川省流行性乙型脑炎流行特征分析             | none     | Japanese encephalitis virus detected in Culex pipiens pallens for the first time in Tianjin                                    | J Prev MedInf                                |
| 2010      | Tianjin        | I型      | -      | HQ718463 | 天津市首次从淡色库蚊检测出基因I型流行性乙型脑炎病毒   | none     | Japanese encephalitis virus detected in Culex pipiens pallens for the first time in Tianjin                                    | Chin J Vector Biol & Control                 |
| 1995-2004 | Zhejiang       | -       | 92.66% | -        | 浙江省1995-2004年流行性乙型脑炎流行病学特征分析 | none     | Epidemiologic Analysis of Japanese B Encephalitis in Zhejiang Province During 1995-2004                                        | Chinese Journal of Vaccines and Immunization |

|           |              |    |                                                                      |                                              |          |                                                                                                                                                     |                                                      |
|-----------|--------------|----|----------------------------------------------------------------------|----------------------------------------------|----------|-----------------------------------------------------------------------------------------------------------------------------------------------------|------------------------------------------------------|
| 2009-2010 | Zhejiang     | I型 | ZJIO-07,<br>ZJ10-10,<br>ZJ10-23,<br>ZJ10-45,<br>ZJ09-52,<br>ZJ09-108 | 浙江省部分地区2009-2010<br>年蚊媒中乙型脑炎病毒分<br>子流行病学特征研究 | 22575117 | Study on the molecular charac-<br>teristics of Japanese encephali-<br>tis virus living in vector mosqui-<br>toes in Zhejiang province 2009-<br>2010 | Chin J<br>Epidemiol                                  |
| 2007      | Yunnan       | I型 | TC07018,<br>TC07172                                                  | 云南分离2株基因I型流<br>行性乙型脑炎病毒的全基<br>因组序列分析         | none     | Full-genome sequencing analy-<br>sis of two strains of Japanese<br>encephalitis virus isolated from<br>Yunnan, China                                | Chin J Viral Dis                                     |
| 2007      | -            | I型 | HEN0701                                                              | 猪源乙型脑炎病毒HEN0701<br>株全基因组的分子特征                | none     | Molecular characterization of<br>complete genome of Japanese<br>encephalitis virus HEN0701<br>strain isolated from swine                            | Chinese<br>Veterinary<br>Science                     |
| 1988      | Wuhan, Hubei | -  | HW                                                                   | 猪乙脑病毒 HW 株的全基<br>因组克隆及分析                     | none     | Cloning and Analysing of<br>Complete cDNA of Japanese<br>Encephalitis Virus of HW Strain                                                            | Journal of<br>Huazhong<br>Agricultural<br>University |
| 1991      | Yunnan       | -  | HB <sub>34</sub>                                                     | 首次从家燕分离到1株乙型<br>脑炎病毒                         | none     | The First Isolation and Identi-<br>fication of Encephalitis B Virus<br>from <i>Hirundo rustica</i> in Yunnan<br>Province                            | Endemic<br>Diseases<br>Bulletin                      |
| 2008      | Shandong     | -  | SD08-10                                                              | 山东省新分离乙脑病毒<br>(SD08-10株)全基因组序<br>列特征         | 20108762 | Molecular characterization of<br>full-length genome of Japanese<br>Encephalitis virus(SD08-10)<br>newly isolated in Shandong<br>province            | Chin J Exp<br>Clin Virol                             |
| 2006-2009 | Jiangsu      | -  | -                                                                    | 江苏省自然人群乙型脑炎<br>抗体血清学监测                       | none     | Sero-epidemiological Survey<br>of Japanese Encephalitis in<br>Natural Population of Jiangsu<br>Province                                             | Practical<br>Preventive<br>Medicine                  |
